# Supplementary material
Source: Springer Nature journal article supplement (https://www.springermedizin.de/resource/supplementary/12936_2008_852_MOESM7_ESM.pdf/9548400)
Supplement: MOESM7 [file 9548400]

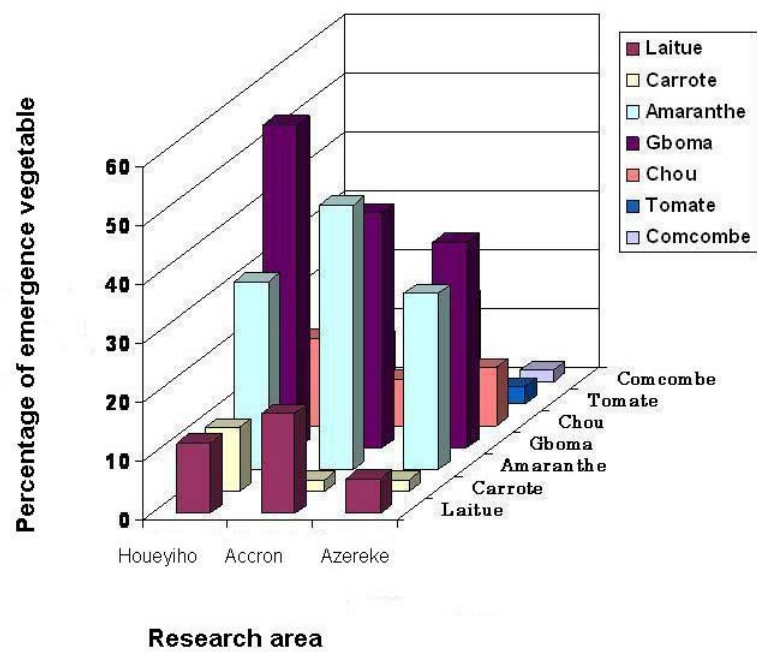

**Figure 9:** Cultivated vegetables in the market gardens at the three sites of study (October 2005-december 2006)
